# Supplementary material
Source: publisher figshare collection journal article supplement (https://tandf.figshare.com/articles/dataset/_/11555661)
Supplement: Supplementary file 1 [file 1]

**Supplementary Table 1-** PICO questions.

|   |                                                                                                                                       |
|---|---------------------------------------------------------------------------------------------------------------------------------------|
|   | Primary                                                                                                                               |
| 1 | What is the effectiveness of misoprostol treatment in reducing the occurrence of failure of IUD insertion?                            |
|   | Secondary                                                                                                                             |
| 2 | What is the effectiveness of misoprostol treatment in reducing the occurrence of pain discomfort (assessed as VAS) of IUCD insertion? |
| 3 | What is the effectiveness of misoprostol treatment in reducing the use of Hegar during IUCD insertion?                                |
| 4 | What are the side effects of misoprostol treatment during IUCD insertion?                                                             |

**Supplementary Table 2-** Summary of the queries.

| Database | Query                                                                                                                                                                                                                                                                           | Date       | Number |
|----------|---------------------------------------------------------------------------------------------------------------------------------------------------------------------------------------------------------------------------------------------------------------------------------|------------|--------|
| PubMed   | ((misoprostol OR prostaglandin OR Cytotec) AND (IUD OR "intrauterine device" OR IUS OR "intrauterine system" OR IUCD OR "intrauterine contraception device" OR IUC OR "intrauterine contraception") AND (insertion OR placement)) AND ("0001/01/01"[PDAT] : "2019/10/23"[PDAT]) | 23.10.2019 | 103    |
| Scopus   | TITLE-ABS-KEY ( ( ( misoprostol OR prostaglandin OR Cytotec ) AND ( IUD OR "intrauterine device" OR IUS OR "intrauterine system" OR IUCD OR "intrauterine contraception device" OR IUC OR "intrauterine contraception" ) AND ( insertion OR placement ) ) )                     | 23.10.2019 | 186    |
